# Supplementary material for: Vascular permeability in retinopathy is regulated by VEGFR2 Y949 signaling to VE-cadherin
Source: eLife. 2020 Apr 21;9:e54056. doi: 10.7554/eLife.54056 (PMC7188482; doi:10.7554/eLife.54056)
Supplement: Figure 1—source data 2. [file elife-54056-fig1-data2.xlsx]

## Sheet: Figure 1 B CNV D14 Lesion Size
	Lesion size in um2
	KDR +/+	KDR Y949F/Y949F
	25124.6	29613
	19857.7	38944.6
	43325.1	44625.8
	23634.7	35978.9
	29825.6	102102
	44163	30726.1
	42596.6	45828
	30435.3	44746.2
	25659.2	68793.6
	46578.4	21916.6
	55389.4	10966.9
	33583.9	45899.9
	53379	33385.3
	64642.9	79388.4
	67394.4	24100.6
	59107.1	13818.4
	35441.1	27782.3
	16674.7	61464.6
	21866.6	30183.6
	36577.7	24647.8
	46032.8	76644.7
	32947.6	37049.8
	45545	54762.5
	54035.6	55436.3
	52298.7	55941.3
	47947.9	37865.9
	38545.9	17343.8
	39640.3	28840.7
	30210.2	34126.3
	19237	24998
	37351.5	40281.2
	24260	44794.6
	78602.1	46933.3
	47872.9	92794.1
	65984.3	63611.1
	51981.3	100537
	85932.6	71643.6
	40479.8	44758.7
	78278.4	32470.8
	31790.7	31104.4
	34424.9	40320.3
	52844.3	17590.8
	31489	91726.1
	15350.5	91726.1
	33371.2	75260
	34012.7	107176
	51940.1	71196.3
	40936.8	29204.2
	20832.5	45199.1
	22847.4	21940.7
	34492.2	34963.8
	74029.3	27787.9
	27740.1	33065.7
	69143.4	31912.5
	193164	65578.1
	82683.1	68803.2
	47048.7	31497
	24995.2	69898.7
	79837	28852.7
	46727	30117.1
	179226
	28569.2
	90334.2
	36191.7
	49427.6
	73544.1
	83464.8

## Sheet: Figure 1 D Microsphere Leakage
	Microsphere area in um2
	KDR +/+	KDR Y949F/Y949F
	2011.31	3236.48
	4285.18	2687.24
	4064.08	1249.57
	5924.59	2964.59
	2805.61	1275.83
	408.201	1022.44
	2984.96	955.865
	4796.11	2046.03
	4876.89	1892.22
	3755.45	1999.97
	4887.51	2940.77
	3951.45	2766.44
	2365.99	2643.91
	3913.85	3852.73
	1562.64	1272.24
	894.312	996.327
	1448.15	1120.87
	1752.76	1031.62
	1931.39	1940.86
	1098.05	3307.22
	2293.24	1411.27
	3160.44	807.937
	1466.37	324.409
	346.074	481.376
	2480.92	973.37
	2076.88	1350.44
	1006.51	1016.13
	1542.27	3696.05
	1095.9	989.44
	3419.85	5733.18
	4038.11	2344.47
	2800.16
	2560.84
	245.208
	1306.96
	2713.21
	955.148
	4546.31
	2962.72
	3478.82
	438.619
	1066.63
	5166.29
	3615.82	2700.49
	3882.05	2840.42
	5414.37	3564.09
	4469.72	2491.28
	5153.44
	3779.76
	8350.39
	2369.13
	3788.77
	4975.41
	2989.82
	3341.49
	2053.94
	2918.01
	6570.07
	2467.96
	4892.75
	3550.24
	3331.57
	4208.33
	1511.54
	2895.84
	5035.91
	4671.53
	6501.96
	3013.6
	3448.64
	1541.55
	4375.97
	2716.71
	3726.84
