# Supplementary material for: Vascular permeability in retinopathy is regulated by VEGFR2 Y949 signaling to VE-cadherin
Source: eLife. 2020 Apr 21;9:e54056. doi: 10.7554/eLife.54056 (PMC7188482; doi:10.7554/eLife.54056)
Supplement: Figure 2—source data 2. [file elife-54056-fig2-data2.xlsx]

## Sheet: Figure 2 B-C OIR Tuft+Avasc
	KDR +/+				KDR Y949F/Y949F
		Tuft %	Avascular %			Tuft %	Avascular %
	Litter 1	10.5594	9.54408		Litter 1	5.57179	6.98745
		8.60882	14.1239		Litter 2	7.11562	11.2973
		9.67341	8.97033			5.93783	9.27633
		7.83527	8.21054		Litter 3	6.28334	13.8507
		9.34623	10.4673			7.85646	14.669
	Litter 2	7.2923	7.1203			4.86611	12.275
		11.2613	10.0813			6.6723	12.8115
	Litter 4	11.1241	15.094			6.23217	13.3488
	Litter 5	7.193	12.4529			8.49516	14.3375
	Litter 6	12.2204	15.2889			7.88972	17.7359
					Litter 4	5.96971	21.602
					Litter 5	7.3404	11.0958
					Litter 6	5.82403	15.0546
						9.6778	18.8282

## Sheet: Figure 2 E Microsphere Area
	KDR +/+	KDR Y949F/Y949F
	0.003675	0.001209
	0.004962
	0.00331847	0.00115637
		0.000636414
	0.008548	0.002577
	0.00655	0.002552
		0.004606
	0.005547	0.001379
