# Supplementary material for: Vascular permeability in retinopathy is regulated by VEGFR2 Y949 signaling to VE-cadherin
Source: eLife. 2020 Apr 21;9:e54056. doi: 10.7554/eLife.54056 (PMC7188482; doi:10.7554/eLife.54056)
Supplement: Figure 3—source data 1. [file elife-54056-fig3-data1.xlsx]

## Sheet: Figure 3 C,D Tufts+Avasc
	Average Tuft area / Total retina area and Avascular area/ Total retina area
	Sh2d2a-iECWT	Tuft %	Avascular %	Sh2d2a-iECKO	Tuft %	Avascular %
	Litter 1	8.0035	16.5754	Litter 1	6.27659	19.5492
		11.9165	19.6449		4.66677	14.8422
	Litter 2	7.55155	20.0055		4.80541	18.0988
		8.58856	17.1415		5.9756	18.2363
	Litter 3	6.46052	21.5781	Litter 2	3.54026	17.7233
		8.68558	18.6218		4.15099	20.1975
		6.52046	16.0588	Litter 3	5.71788	17.299
		6.02083	16.7687		2.89469	23.5553
	Litter 4	6.9106	15.1981		4.51839	21.3019
		8.46084	17.5187		3.17056	20.5062
					3.30196	20.7954
				Litter 4	6.12847	20.8394
					3.69415	14.7417
					3.08038	16.482
					4.82208	17.449

## Sheet: Figure 3 F Junctional pSrc 
	Junctional Src pY418/total junctional area
	KDR +/+	KDR Y949F/Y949F
	0.60389	0.614877
	0.665397	0.651211
	0.576944	0.596626
	0.527392	0.582806
	0.565508	0.674549
	0.597616	0.728009
	0.750751	0.364138
	0.724393

## Sheet: Figure 3 IJ pVEC
	VEC pY area/ total VEC area
	VE-cadherin pY658			VE-cadherin pY685
	KDR +/+	KDR Y949F/Y949F		KDR +/+	KDR Y949F/Y949F
	0.55491	0.584461		0.576348	0.461608
	0.646301	0.609585		0.502516	0.410247
	0.604042	0.701408		0.473348	0.391147
	0.637369	0.612973		0.559778	0.353553
	0.65063	0.607917		0.451346	0.212173
	0.724849			0.425427	0.368736
	0.700872			0.44868	0.341311
					0.479774
					0.42258
