# Supplementary material for: Vascular permeability in retinopathy is regulated by VEGFR2 Y949 signaling to VE-cadherin
Source: eLife. 2020 Apr 21;9:e54056. doi: 10.7554/eLife.54056 (PMC7188482; doi:10.7554/eLife.54056)
Supplement: Figure 4—source data 1. [file elife-54056-fig4-data1.xlsx]

## Sheet: Figure 4 B VECpY685 in Kdr CNV
	Fold change of junctional VE-cadherin pY685 staining intensity. Fold change is set relative to the mean wildtype value.
	KDR +/+	KDR Y949F/Y949F
	1.18191	1.13599
	0.734791	0.770986
	1.37301	0.807864
	0.427491	1.07679
	1.38687	0.538356
	0.678993	0.472068
	0.702844	0.767787
	1.34953	0.623155
	1.79106	0.469388
	1.58253	0.537608
	0.960444	0.576916
	1.02805	0.369652
	0.768384	0.899182
	0.903256	0.68908
	0.779263
	1.0246
	0.896372
	0.612785
	0.740938
	1.07689
	1.20132
	0.627549
	0.637756
	0.444321
	1.27291
	1.13977
	0.932406
	1.74396

## Sheet: Fig 4 D,E VEC-Y685 Tuft+Avasc
	Tuft area relative to total retina area and avascular area relative to total retina area
	VEC-WT	Tuft %	Avascular %	VEC-Y685F	Tuft %	Avascular %
	litter 1	11.2184	19.1271	litter1	6.31627	14.2856
	litter 2	14.0935	18.7646		6.1278	16.1592
	litter 3	7.10572	18.8799		4.90056	12.9296
		7.12323	18.6932	litter2	6.09787	12.8004
		6.97679	14.9878	litter3	5.78089	18.5796
	litter 4	10.4076	12.1065		7.75893	17.5388
	litter 5	11.6794	14.7164	litter4	8.02928	18.654
		8.7827	15.6673	litter5	4.10992	13.3193
					3.80404	10.3254
				litter6	8.11342	16.5234
					5.21955	13.4244

## Sheet: Fig 4 G VEC-Y685 Microsphere
	Average extravasated microsphere area in tufts
	VEC-WT	VEC-Y685F
	0.003711	0.000646765
	0.002356	0.001717
	0.003365	0.001153
	0.004662	0.002121
	0.006183	0.001317
		0.0016
		0.00218
