# Supplementary material for: Vascular permeability in retinopathy is regulated by VEGFR2 Y949 signaling to VE-cadherin
Source: eLife. 2020 Apr 21;9:e54056. doi: 10.7554/eLife.54056 (PMC7188482; doi:10.7554/eLife.54056)
Supplement: Table 1—source data 1. [file elife-54056-table1-data1.xlsx]

## Sheet: Kdr BW
Kdr +/+	Tuft %	Avascular %	BW (grams)	Kdr Y949F/Y949F	Tuft %	Avascular %	BW (grams)
Litter 1	10.5594	9.54408	5.88	Litter 1	5.57179	6.98745	6.13
	8.60882	14.1239	6.38	Litter 2	7.11562	11.2973	7.77
	9.67341	8.97033	5.7		5.93783	9.27633	7.38
	7.83527	8.21054	5.93	Litter 3	6.28334	13.8507	not recorded
	9.34623	10.4673	6.13		7.85646	14.669	not recorded
Litter 2	7.2923	7.1203	8.52		4.86611	12.275	not recorded
	11.2613	10.0813	7.67		6.6723	12.8115	not recorded
Litter 4	11.1241	15.094	not recorded		6.23217	13.3488	not recorded
Litter 5	7.193	12.4529	6.3		8.49516	14.3375	not recorded
Litter 6	12.2204	15.2889	6.3		7.88972	17.7359	not recorded
				Litter 4	5.96971	21.602	not recorded
				Litter 5	7.3404	11.0958	7.1
				Litter 6	5.82403	15.0546	6.3
					9.6778	18.8282	6.5
		Average=	6.53444			Average=	6.86333
		SD	0.936698			SD	0.653014
		n=10				n=14

## Sheet: Sh2d2a BW
Sh2d2a-iECWT	Tuft %	Avascular %	BW (grams)	Sh2d2a-iECKO	Tuft %	Avascular %	BW (grams)
Litter 1	8.0035	16.5754	6.46	Litter 1	6.27659	19.5492	7.12
	11.9165	19.6449	6.42		4.66677	14.8422	7.52
Litter 2	7.55155	20.0055	6.75		4.80541	18.0988	6.24
	8.58856	17.1415	5.66		5.9756	18.2363	6.11
Litter 3	6.46052	21.5781	4.44	Litter 2	3.54026	17.7233	5.61
	8.68558	18.6218	5.41		4.15099	20.1975	6.08
	6.52046	16.0588	5.34	Litter 3	5.71788	17.299	4.82
	6.02083	16.7687	5.48		2.89469	23.5553	4.98
Litter 4	6.9106	15.1981	not recorded		4.51839	21.3019	4.84
	8.46084	17.5187	not recorded		3.17056	20.5062	4.53
					3.30196	20.7954	4.65
				Litter 4	6.12847	20.8394	not recorded
					3.69415	14.7417	not recorded
					3.08038	16.482	not recorded
					4.82208	17.449	not recorded
		Average=	5.745			Average=	5.68182
		SD	0.759097			SD	1.02182
		n=10				n=15

## Sheet: VEC-Y685F BW
WT	Tuft %	Avascular %	BW (grams)	VEC-Y685F	Tuft %	Avascular %	BW (grams)
litter1	8.31177	13.0522	5.7	litter1	6.31627	14.2856	5.1
	8.36294	16.0499	6.3		6.1278	16.1592	6.1
litter2	8.95208	10.5514	7.4		4.90056	12.9296	5.9
litter3	9.19433	17.4164	6.9	litter2	6.09787	12.8004	7.6
	8.8099	17.4903	7.1	litter3	5.78089	18.5796	6.8
litter4	9.35685	16.5427	8		7.75893	17.5388	7.2
litter5	10.6651	14.0406	not recorded	litter4	8.02928	18.654	7.8
	7.41315	13.1632	not recorded	litter5	4.10992	13.3193	not recorded
litter6	9.15313	17.6354	5.22		3.80404	10.3254	not recorded
	8.35272	17.9778	5.3	litter6	8.11342	16.5234	5.2
					5.21955	13.4244	5.6
		Average=	6.49			Average=	6.36667
		SD	1.02383			SD	1.01858
		n=10				n=11

## Sheet: VEC-WT BW
WT	Tuft %	Avascular %	BW (grams)	VEC-WT	Tuft %	Avascular %	BW (grams)
litter 1	10.4904	18.2127	5.6	litter 1	11.2184	19.1271	5.4
litter 2	10.2129	20.7171	5.4	litter 2	14.0935	18.7646	5.6
litter 3	8.23924	20.3097	5.5	litter 3	7.10572	18.8799	5.4
	6.57611	16.2789	5.1		7.12323	18.6932	5.3
litter 4	5.93076	18.0698	7.2		6.97679	14.9878	4.9
litter 5	11.7481	18.1112	6.2	litter 4	10.4076	12.1065	7.5
				litter 5	11.6794	14.7164	7
					8.7827	15.6673	6.4
		Average=	5.83333			Average=	5.9375
		SD	0.760701			SD	0.922632
		n=6				n=8
